# Supplementary material for: Synthesis, characterization, enhanced sunlight photocatalytic properties, and stability of Ag/Ag3PO4nanostructure-sensitized BiPO4
Source: Royal Society of Chemistry journal article supplement (doi:10.1039/c5ra07101a), 2015-01-01
Supplement: c5ra07101a1.pdf [file c5ra07101a1.pdf]

## Supporting information

### Synthesis, Characterization, Enhanced Sunlight Photocatalytic Properties, and

### Stability of Ag/Ag<sub>3</sub>PO<sub>4</sub> Nanostructure-Sensitized BiPO<sub>4</sub>

*Tzu-Yun Huang<sup>1</sup>, Yen-Jui Chen<sup>1</sup>, Chi-Yung Lai<sup>2</sup> and Yang-Wei Lin<sup>1,\*</sup>*

<sup>1</sup> Department of Chemistry, National Changhua University of Education, Changhua  
City, Taiwan, ROC

<sup>2</sup> Graduate Institute of Biotechnology, National Changhua University of Education,  
Changhua City, Taiwan, ROC

E-mail: linyejerry@cc.ncue.edu.tw (Y.W.L.)

**MB**

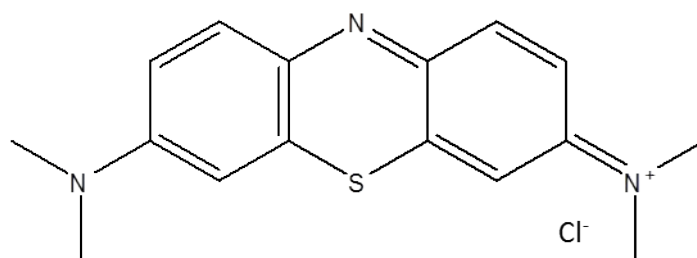

**RhB**

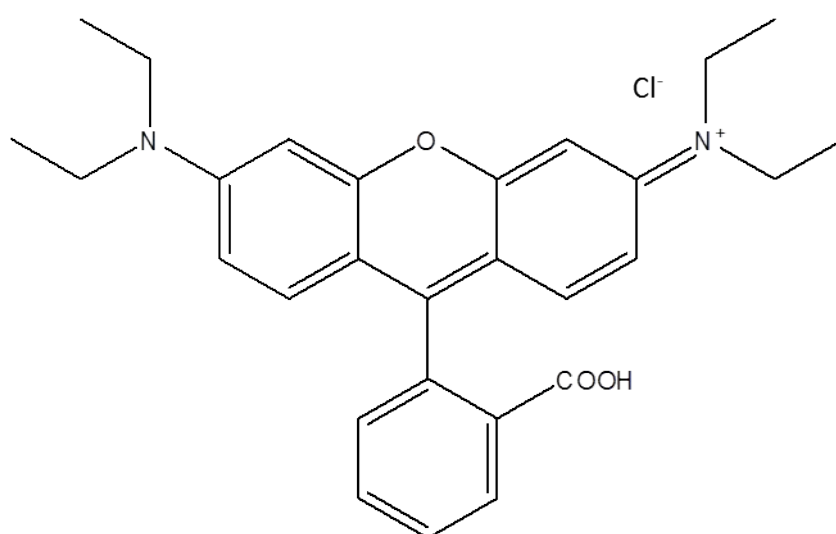

**MO**

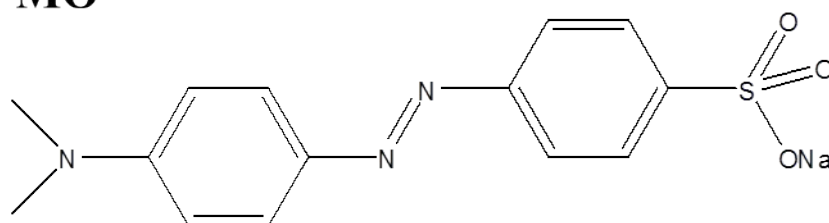

Figure S1. Molecular structures of MB, RhB, and MO.

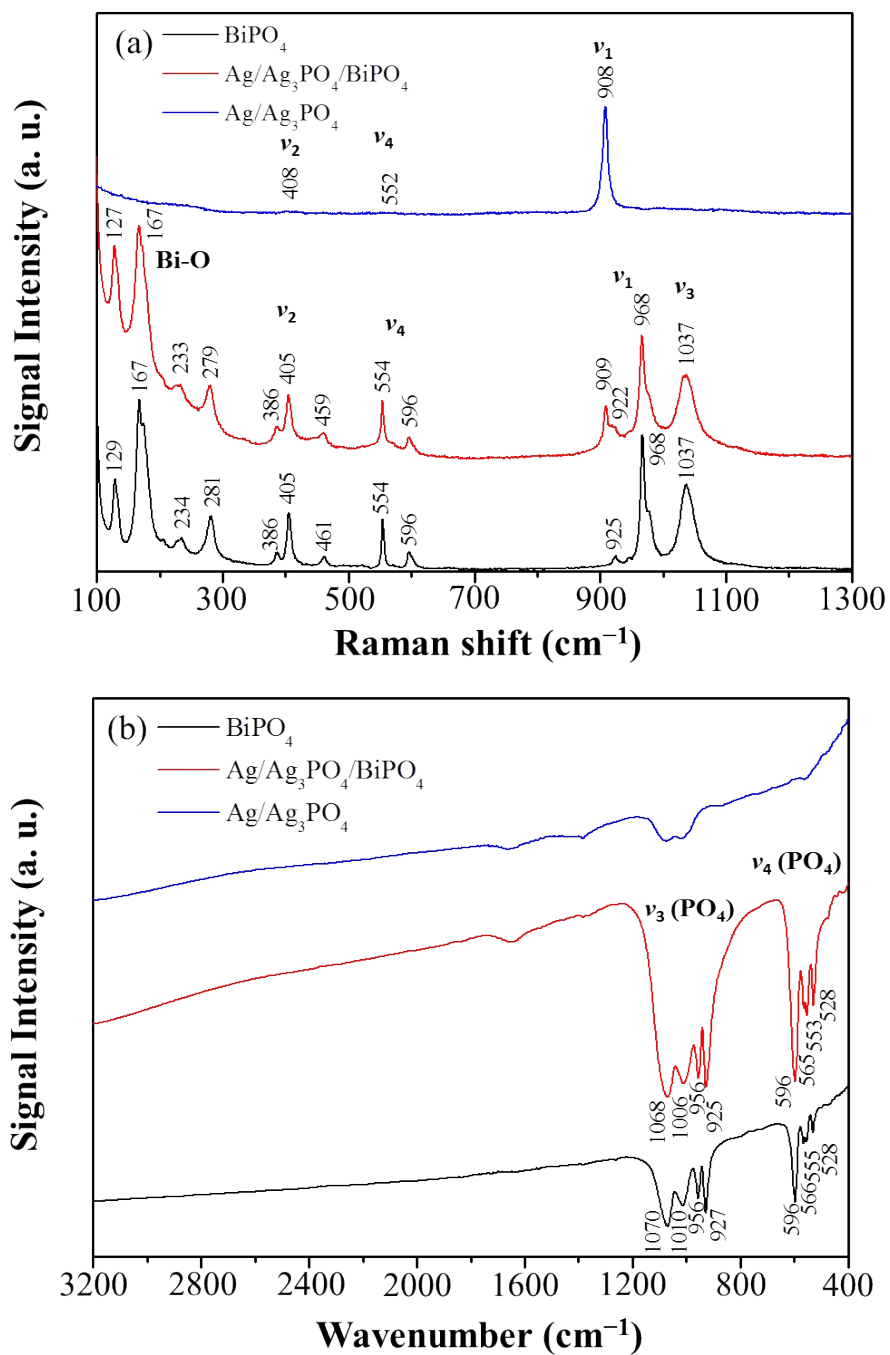

Figure S2. (a) Raman and (b) FTIR spectra of as-prepared BiPO<sub>4</sub>, Ag/Ag<sub>3</sub>PO<sub>4</sub>/BiPO<sub>4</sub>, and Ag/Ag<sub>3</sub>PO<sub>4</sub>.

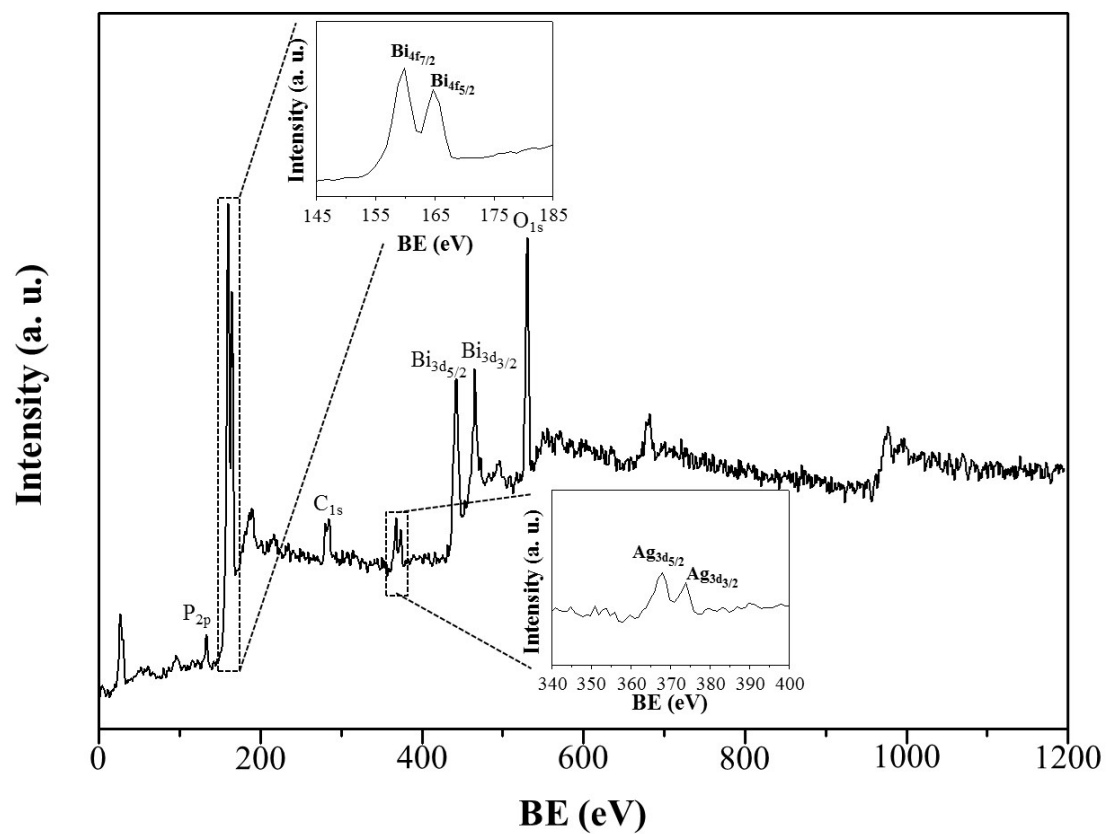

Figure S3. X-ray photoelectron spectroscopy (XPS) spectra of as-prepared Ag/Ag<sub>3</sub>PO<sub>4</sub>/BiPO<sub>4</sub>.

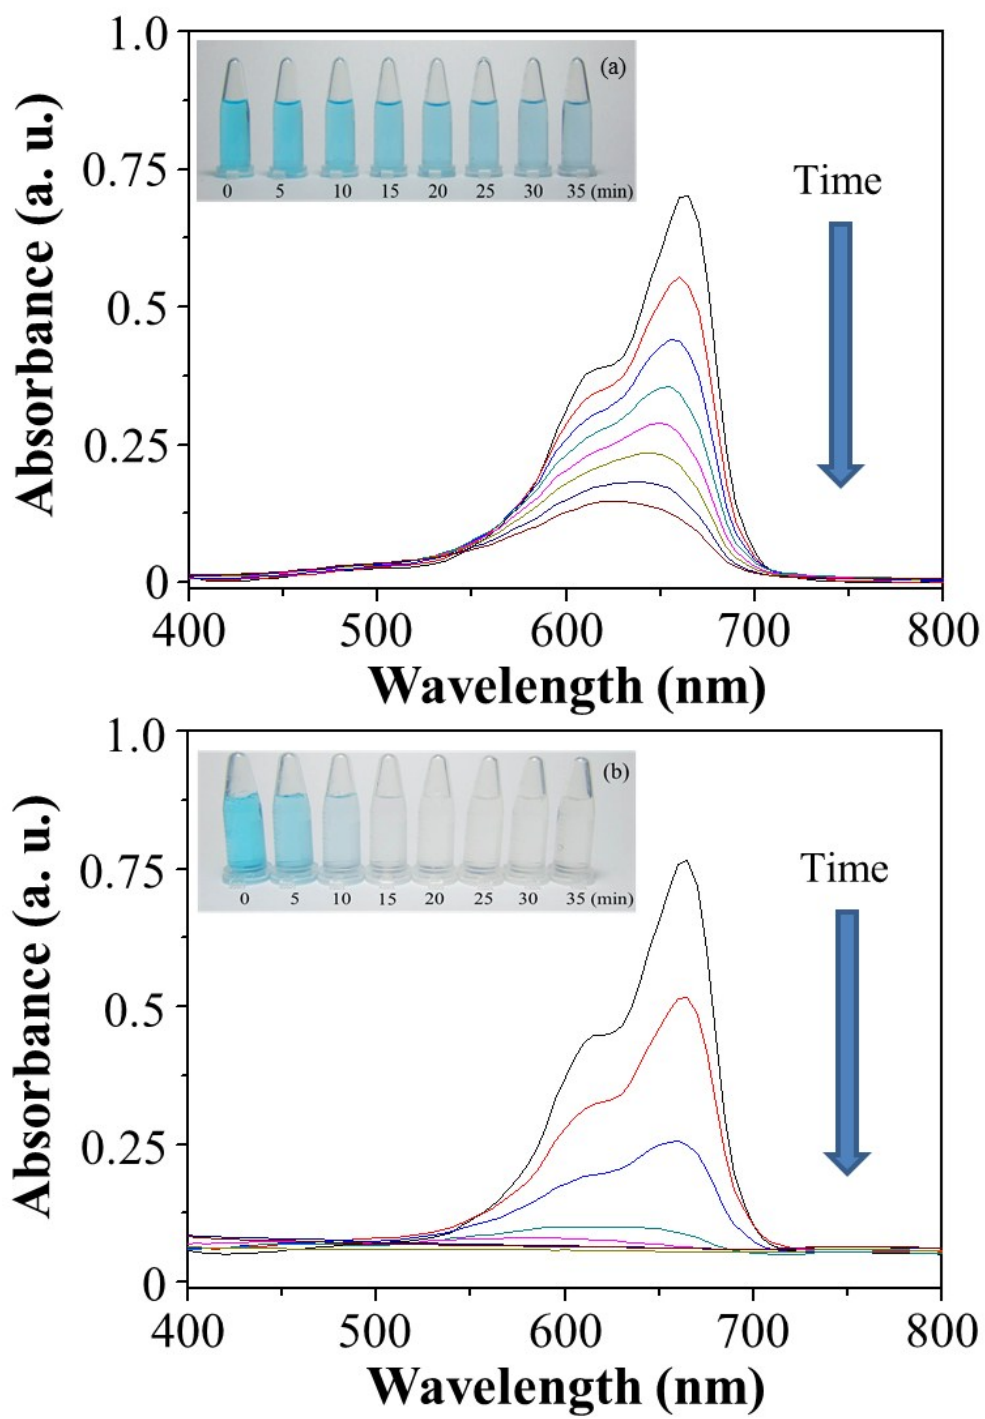

Figure S4. Temporal evolution of the spectral change upon MB degradation over (a)

BiPO<sub>4</sub> and (b) 15%Ag/Ag<sub>3</sub>PO<sub>4</sub>/BiPO<sub>4</sub>.

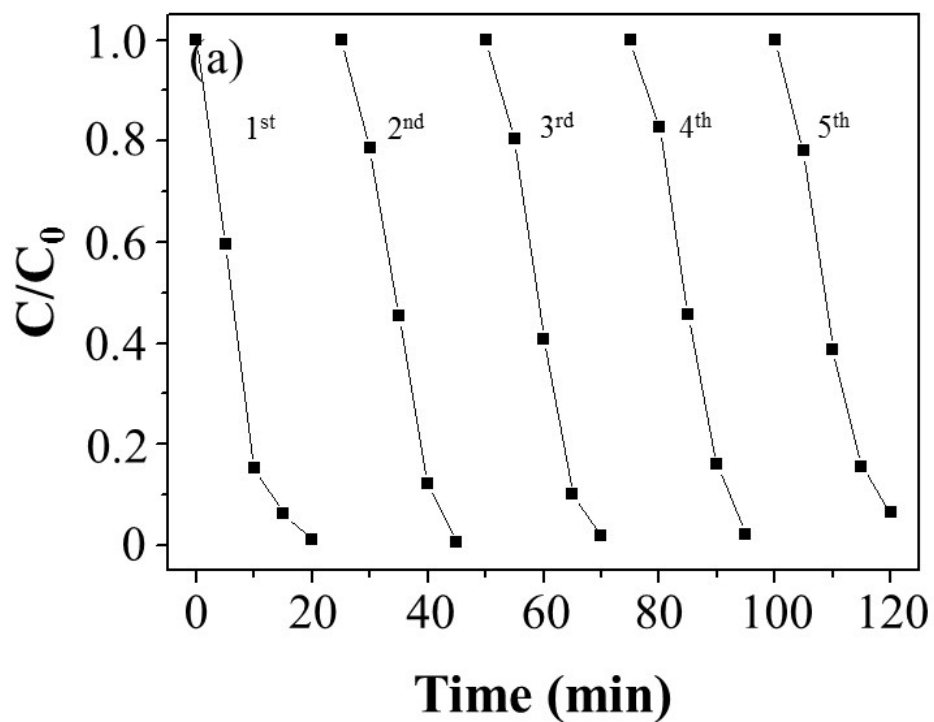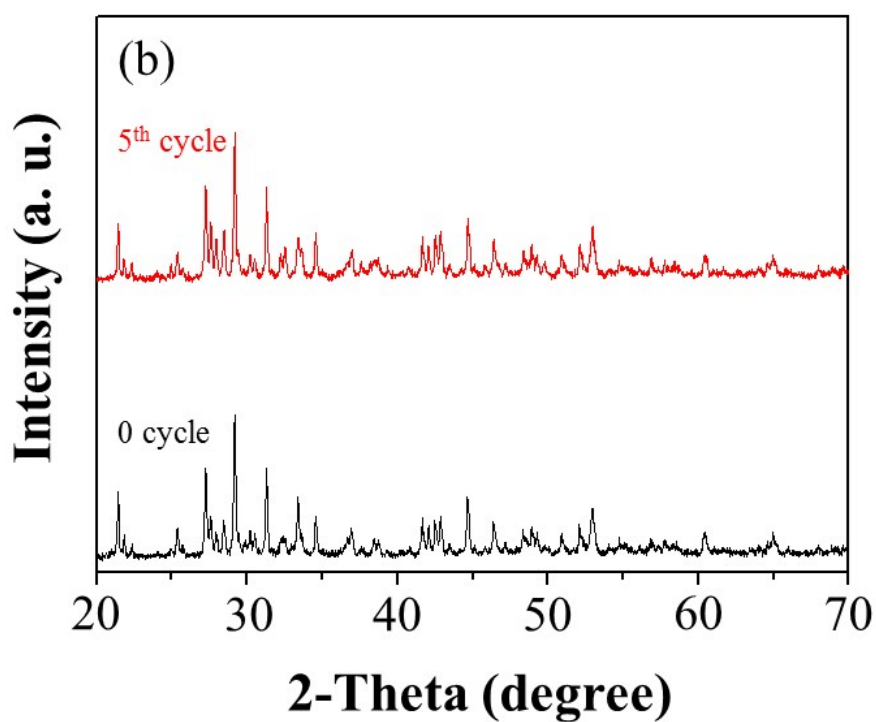

Figure S5. (a) Cycling runs of MB photocatalytic degradation in the presence of 15%Ag/Ag<sub>3</sub>PO<sub>4</sub>/BiPO<sub>4</sub> products and (b) XRD pattern for 15%Ag/Ag<sub>3</sub>PO<sub>4</sub>/BiPO<sub>4</sub> after being used for five reaction cycles.

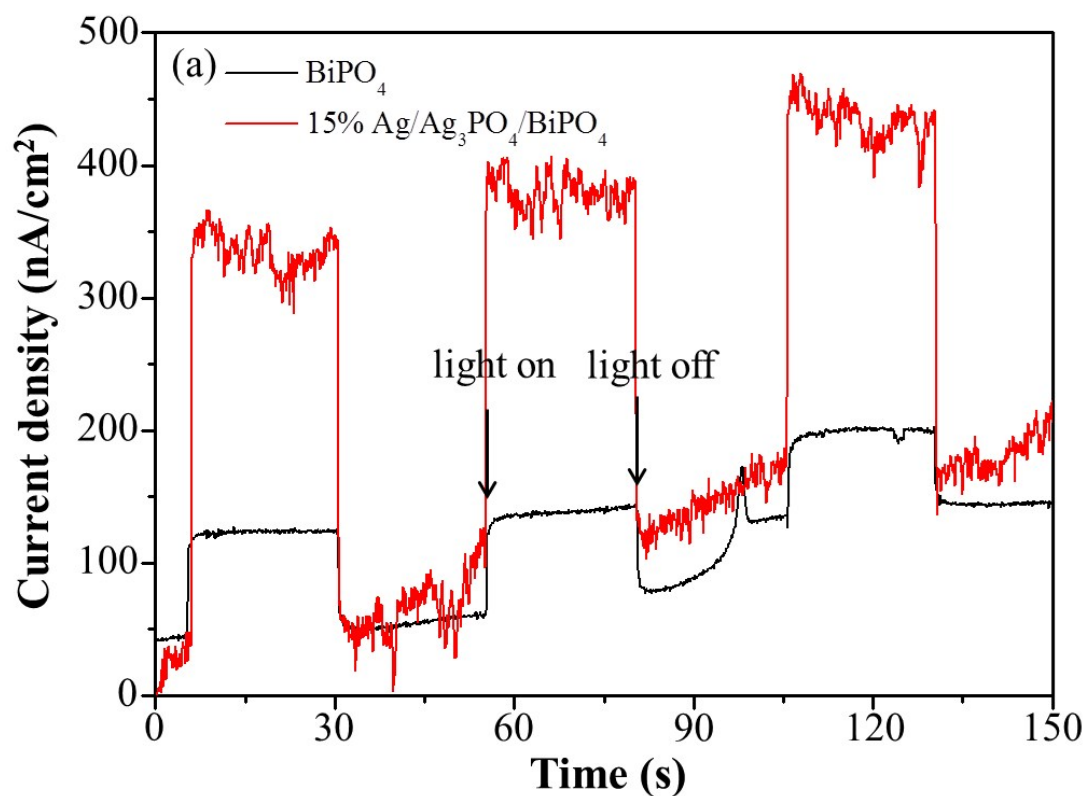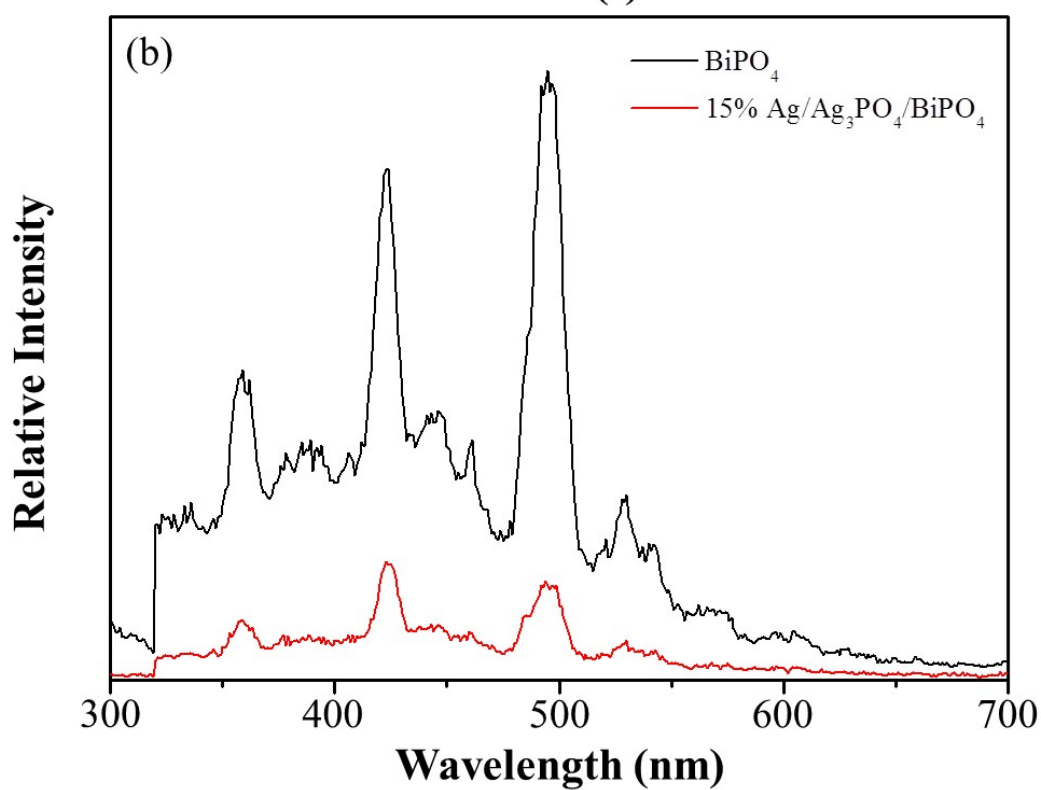

Figure S6. (a) Photocurrents and (b) PL spectra measured at  $\lambda_{\text{ex}} = 250$  nm of BiPO<sub>4</sub> and 15%Ag/Ag<sub>3</sub>PO<sub>4</sub>/BiPO<sub>4</sub>.

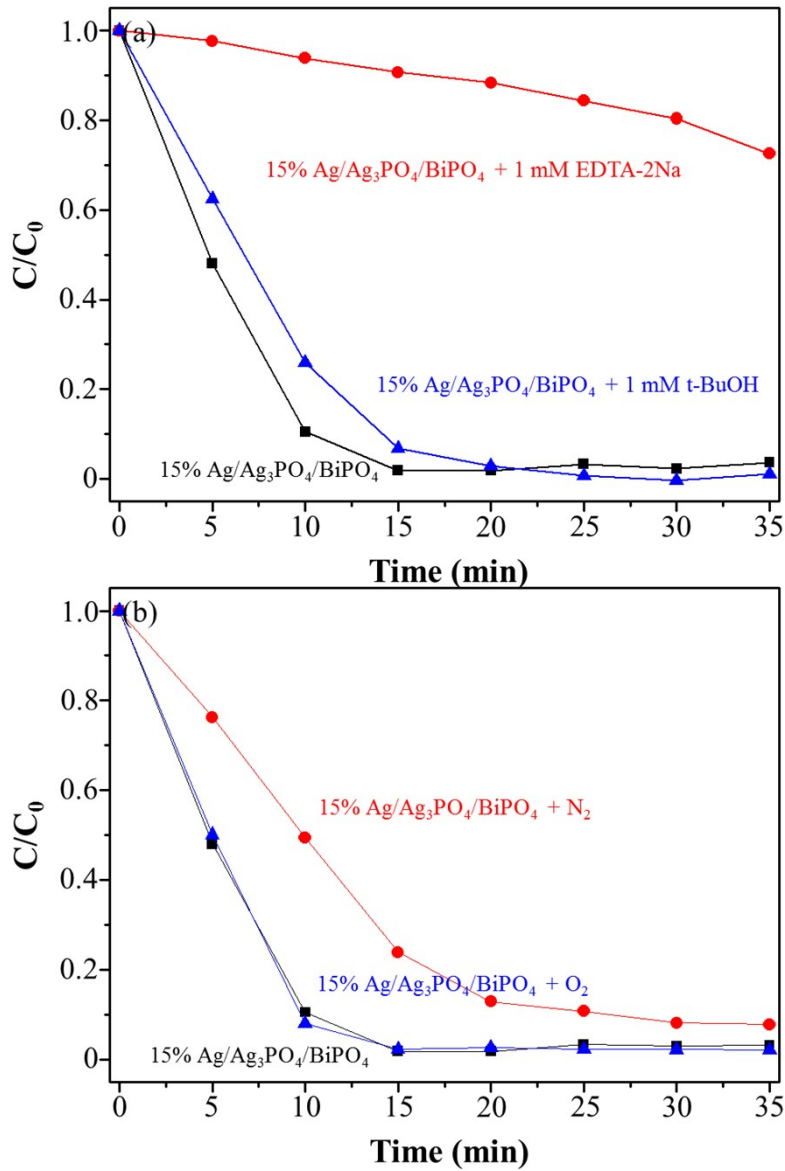

Figure S7. (a) Plots of photogenerated carrier trapping for MB photodegradation catalyzed by 15%Ag/Ag<sub>3</sub>PO<sub>4</sub>/BiPO<sub>4</sub>. (b) Effect of O<sub>2</sub> and N<sub>2</sub> on MB photocatalytic degradation in the presence of 15%Ag/Ag<sub>3</sub>PO<sub>4</sub>/BiPO<sub>4</sub>.



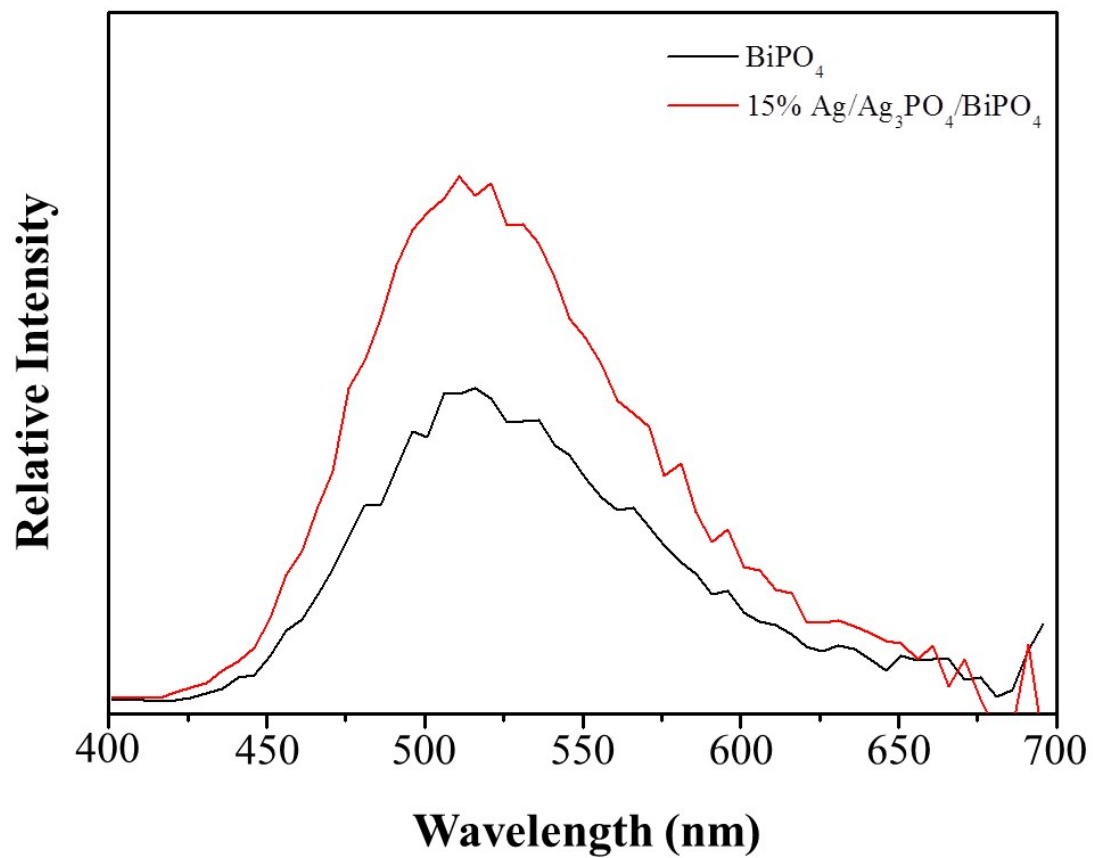

Figure S8. PL spectra of BiPO<sub>4</sub> and 15%Ag/Ag<sub>3</sub>PO<sub>4</sub>/BiPO<sub>4</sub> in coumarin solution measured at  $\lambda_{\text{ex}} = 370$  nm (each sample was illuminated for 15 min under visible light).
